# Supplementary material for: Kinase Inhibitor Profile for Human Nek1, Nek6, and Nek7 and Analysis of the Structural Basis for Inhibitor Specificity
Source: PubMed Central journal article supplement (PMC6272266; doi:10.3390/molecules20011176), 2015-01-13
Supplement: molecules-20-01176-s001.pdf [file molecules-20-01176-s001.pdf]

## Supplementary Materials

**Table S1.** List of compounds used in the thermal shift screenings. Note: The following information can be accessed at PubChem database [1]: <http://pubchem.ncbi.nlm.nih.gov>.

| Description                  | CAS Number  | Structure                                                                            | PubChem Compound ID |
|------------------------------|-------------|--------------------------------------------------------------------------------------|---------------------|
| KN-62                        | 127191-97-3 | 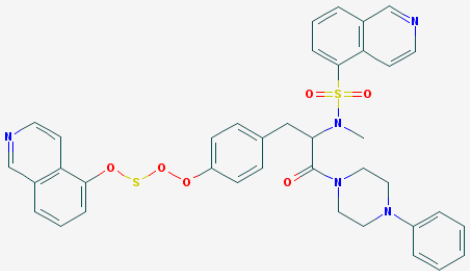   | 16760529            |
| ATM Kinase Inhibitor         | 587871-26-9 |    | 5278396             |
| ATM/ATR Kinase Inhibitor     | 905973-89-9 |  | 6605258             |
| Alsterpaullone               | 237430-03-4 |  | 5005498             |
| Alsterpaullone, 2-Cyanoethyl | 852527-97-0 |  | 16760286            |

Table S1. Cont.

| Description                   | CAS Number  | Structure                                                                            | PubChem Compound ID |
|-------------------------------|-------------|--------------------------------------------------------------------------------------|---------------------|
| Aloisine A, RP107             | 496864-16-5 | 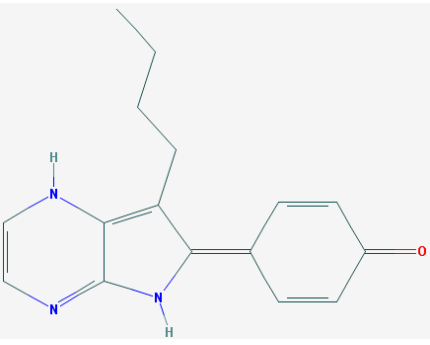   | 5326843             |
| Aloisine, RP106               | 496864-15-4 |   | 3641059             |
| Aminopurvalanol A             | 220792-57-4 |  | 6604931             |
| AMPK Inhibitor,<br>Compound C | 866405-64-3 |  | 11524144            |

Table S1. Cont.

| Description                 | CAS Number  | Structure                                                                                                                                                                                                                                                                                                                                                                            | PubChem Compound ID |
|-----------------------------|-------------|--------------------------------------------------------------------------------------------------------------------------------------------------------------------------------------------------------------------------------------------------------------------------------------------------------------------------------------------------------------------------------------|---------------------|
| Aurora Kinase Inhibitor III | 879127-16-9 | 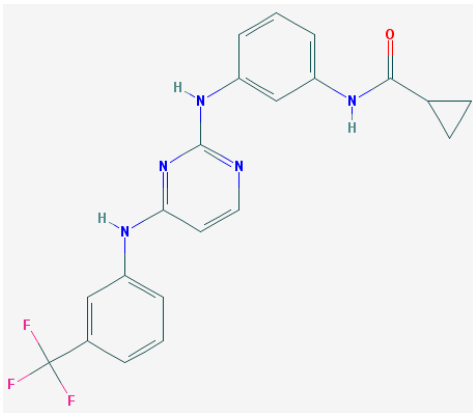 <p>The structure shows a central pyrimidine ring. One nitrogen is substituted with a 4-(difluoromethyl)phenyl group. The other nitrogen is substituted with a 4-(cyclopropylcarbamoyl)phenyl group.</p>                                                                                           | 9549303             |
| Aurora Kinase/Cdk Inhibitor | 443797-96-4 |  <p>The structure features a central pyrazole ring. One nitrogen is substituted with a cyano group (-C≡N). The other nitrogen is substituted with a 4-(2,6-difluorophenyl)phenyl group. A sulfonamide group (-SO<sub>2</sub>NH<sub>2</sub>) is attached to the 4-position of the phenyl ring.</p> | 16760303            |
| Indirubin-3'-monoxime       | 160807-49-8 |  <p>The structure consists of two indole rings connected at their 2-positions. The 3-position of the right-hand indole ring is substituted with a hydroxyl group (-OH).</p>                                                                                                                      | 5326739             |
| BAY 11-7082                 | 19542-67-7  |  <p>The structure shows a central benzene ring. At the 4-position, there is a sulfonamide group (-SO<sub>2</sub>NH<sub>2</sub>). At the 1-position, there is a prop-2-en-1-yl group (-CH=CH<sub>2</sub>).</p>                                                                                     | 5353431             |

Table S1. Cont.

| Description                  | CAS Number  | Structure                                                                            | PubChem Compound ID |
|------------------------------|-------------|--------------------------------------------------------------------------------------|---------------------|
| Bohemine                     | 189232-42-6 | 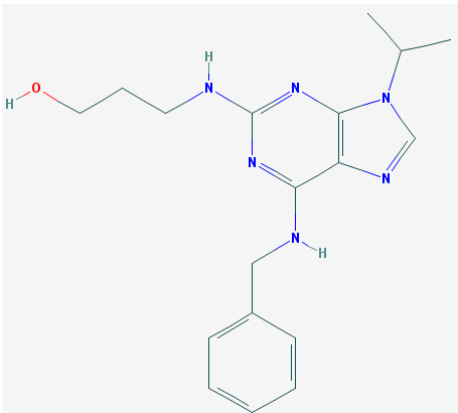   | 2422                |
| Cdk1 Inhibitor               | 220749-41-7 |   | 5472558             |
| Cdk1 Inhibitor,<br>CGP74514A | 190654-01-4 |  | 2794188             |
| Cdk1/2 Inhibitor III         | 443798-55-8 |  | 5330812             |

Table S1. Cont.

| Description                          | CAS Number  | Structure                                                                            | PubChem Compound ID |
|--------------------------------------|-------------|--------------------------------------------------------------------------------------|---------------------|
| Cdk1/5 Inhibitor                     | 40254-90-8  | 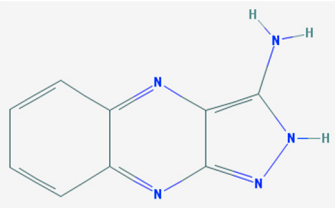   | 438981              |
| Casein Kinase I Inhibitor, D4476     | 301836-43-1 |   | 6419753             |
| Casein Kinase II Inhibitor III, TBCA | 934358-00-6 |  | 16760346            |
| Cdk4 Inhibitor                       | 546102-60-7 |  | 5330797             |

Table S1. Cont.

| Description                          | CAS Number  | Structure                                                                            | PubChem Compound ID |
|--------------------------------------|-------------|--------------------------------------------------------------------------------------|---------------------|
| Cdk4 Inhibitor II,<br>NSC 625987     | 141992-47-4 | 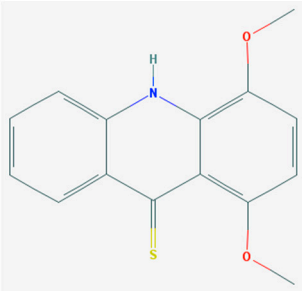   | 3004085             |
| Cdk4 Inhibitor III                   | 265312-55-8 |    | 481747              |
| Cdc2-Like Kinase<br>Inhibitor, TG003 | 300801-52-9 |   | 1893668             |
| Chk2 Inhibitor II                    | 516480-79-8 |  | 9969021             |
| Compound 52                          | 212779-48-1 |  | 2856                |

Table S1. Cont.

| Description                  | CAS Number  | Structure | PubChem Compound ID |
|------------------------------|-------------|-----------|---------------------|
| Cdk2 Inhibitor III           | 199986-75-9 |           | 6918386             |
| Cdk2 Inhibitor IV,<br>NU6140 | 444723-13-1 |           | 10202471            |
| Cdk/Crk Inhibitor            | 784211-09-2 |           | 9549301             |
| ERK Inhibitor III            |             |           | 5339183             |

Table S1. Cont.

| Description                           | CAS Number  | Structure                                                                            | PubChem Compound ID |
|---------------------------------------|-------------|--------------------------------------------------------------------------------------|---------------------|
| ROCK Inhibitor,<br>Y-27632            | 146986-50-7 | 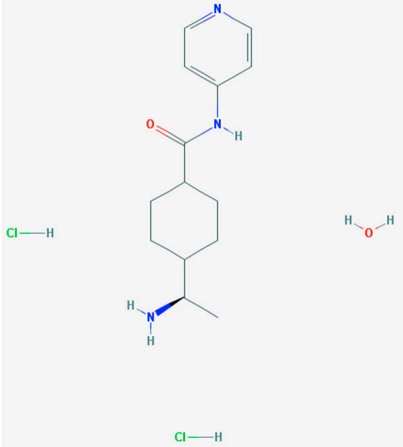   | 9797929             |
| ERK Inhibitor II,<br>FR180204         | 865362-74-9 |   | 11493598            |
| ERK Inhibitor II,<br>Negative control |             |  | 16760417            |
| Fascaplysin,<br>Synthetic             | 114719-57-2 |  | 73292               |



Table S1. Cont.

| Description           | CAS Number  | Structure                                                                           | PubChem Compound ID |
|-----------------------|-------------|-------------------------------------------------------------------------------------|---------------------|
| GSK-3b Inhibitor I    | 327036-89-5 | 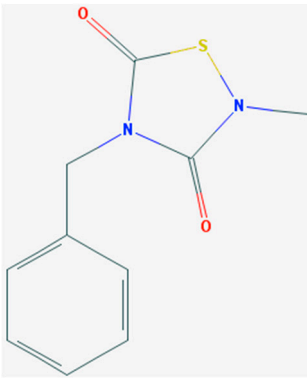  | 4124851             |
| GSK-3b Inhibitor II   | 478482-75-6 |  | 6539732             |
| GSK-3b Inhibitor VIII | 487021-52-3 |  | 448014              |

Table S1. Cont.

| Description         | CAS Number  | Structure                                                                            | PubChem Compound ID |
|---------------------|-------------|--------------------------------------------------------------------------------------|---------------------|
| GSK-3 Inhibitor IX  | 667463-62-9 | 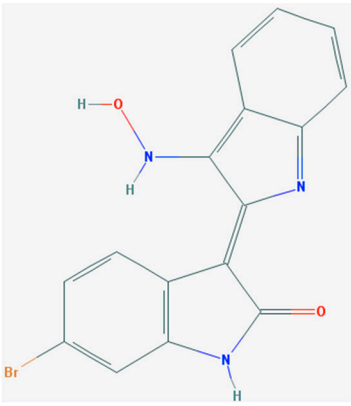   | 5287844             |
| GSK-3 Inhibitor X   | 667463-85-6 |   | 6538818             |
| GSK-3b Inhibitor XI | 626604-39-5 |  | 10020713            |
| SU6656              | 330161-87-0 |  | 5312137             |

Table S1. Cont.

| Description          | CAS Number  | Structure                                                                            | PubChem Compound ID |
|----------------------|-------------|--------------------------------------------------------------------------------------|---------------------|
| GSK-3 Inhibitor XIII | 404828-08-6 | 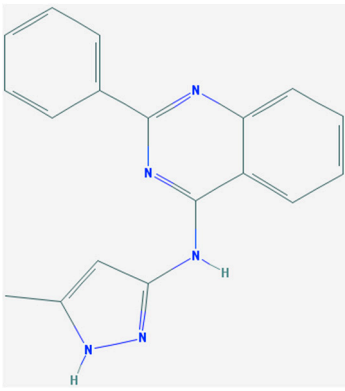   | 6419766             |
| Isogranulatimide     | 244148-46-7 |   | 6419741             |
| IC261                | 186611-52-9 |  | 3674                |
| IKK-2 Inhibitor IV   | 507475-17-4 |  | 9903786             |

Table S1. Cont.

| Description                     | CAS Number  | Structure                                                                                                                                                                                                                                                                                                                                                                                                                                                                                                                                    | PubChem Compound ID |
|---------------------------------|-------------|----------------------------------------------------------------------------------------------------------------------------------------------------------------------------------------------------------------------------------------------------------------------------------------------------------------------------------------------------------------------------------------------------------------------------------------------------------------------------------------------------------------------------------------------|---------------------|
| Indirubin Derivative E804       |             | 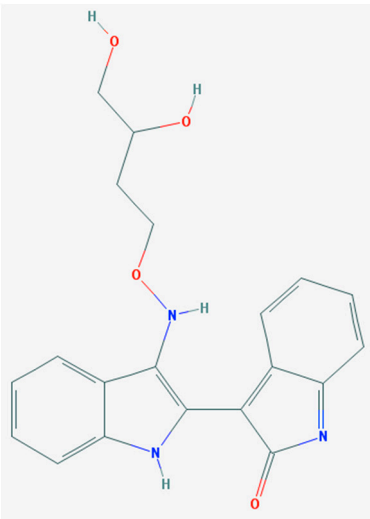 <p>The structure shows a central indole ring system (two fused benzene rings with an NH group) connected at the 3-position to a pyrazole ring. The pyrazole ring has a carbonyl group (=O) at the 4-position and is further substituted at the 5-position with a propyl chain. This propyl chain is linked via an oxygen atom to a secondary amine group (-NH-), which is in turn connected to another propyl chain ending in a hydroxyl group (-OH).</p> | 6419764             |
| JNK Inhibitor II                | 129-56-6    |  <p>The structure is a tricyclic indole derivative. It features a central benzene ring fused to two other benzene rings. A pyrazole ring is fused to the central benzene ring, with a hydrogen atom on one of its nitrogens. A carbonyl group (=O) is attached to the central benzene ring.</p>                                                                                                                                                           | 8515                |
| JNK Inhibitor, Negative Control | 54642-23-8  |  <p>The structure is a tricyclic indole derivative, similar to JNK Inhibitor II, but with a methyl group (-CH3) attached to the nitrogen atom of the pyrazole ring.</p>                                                                                                                                                                                                                                                                                  | 11665831            |
| JNK Inhibitor V                 | 345987-15-7 |  <p>The structure features a benzothiazole ring system (a benzene ring fused to a five-membered ring containing one sulfur and one nitrogen atom). This is connected at the 2-position to a pyridine ring. The pyridine ring is further substituted at the 3-position with a propyl chain ending in a secondary amine group (-NH-), which is connected to another pyridine ring.</p>                                                                     | 11422035            |

Table S1. Cont.

| Description                | CAS Number  | Structure                                                                                                                                                                                                                                                                                                                                                                                                                                 | PubChem Compound ID |
|----------------------------|-------------|-------------------------------------------------------------------------------------------------------------------------------------------------------------------------------------------------------------------------------------------------------------------------------------------------------------------------------------------------------------------------------------------------------------------------------------------|---------------------|
| JNK Inhibitor IX           | 312917-14-9 | 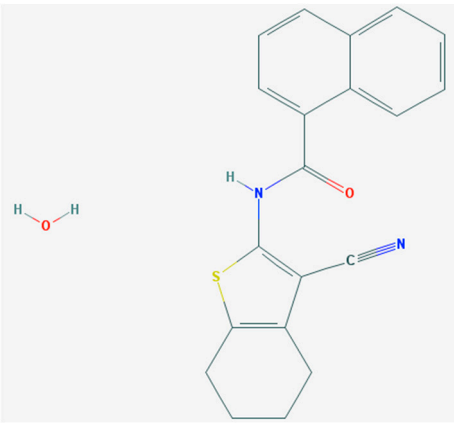 <p>The structure shows a naphthalene ring system attached to a carbonyl group, which is linked to a nitrogen atom. This nitrogen is part of a five-membered ring containing a sulfur atom. A cyano group (-C≡N) is attached to the same carbon in the five-membered ring. A water molecule (H<sub>2</sub>O) is shown nearby.</p>                       | 16760525            |
| MK2a Inhibitor             | 41179-33-3  |  <p>The structure features a central amide group (-NH-) connecting a 4-hydroxyphenyl ring to a propyl chain. The propyl chain is further connected to a para-substituted benzene ring, which is in turn connected to a 2-fluorophenyl ring.</p>                                                                                                        | 11382492            |
| JNK Inhibitor VIII         | 894804-07-0 |  <p>The structure consists of a pyridine ring substituted with a cyano group (-C≡N), an ethoxy group (-OCH<sub>2</sub>CH<sub>3</sub>), and a secondary amide group (-NH-). The amide group is linked to a propyl chain, which is attached to a benzene ring. The benzene ring has two methoxy groups (-OCH<sub>3</sub>) at the 3 and 4 positions.</p> | 11624601            |
| K-252a,<br>Nocardiosis sp. | 97161-97-2  |  <p>The structure is a complex polycyclic molecule with multiple nitrogen atoms. It features a central ring system with various substituents, including a methyl group, a hydroxyl group (-OH), and a methoxy group (-OCH<sub>3</sub>).</p>                                                                                                           | 490561              |

Table S1. Cont.

| Description      | CAS Number  | Structure                                                                            | PubChem Compound ID |
|------------------|-------------|--------------------------------------------------------------------------------------|---------------------|
| Kenpaullone      | 142273-20-9 | 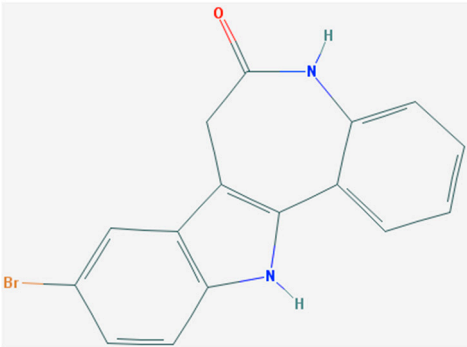   | 3820                |
| KN-93            | 139298-40-1 |    | 5312122             |
| MEK Inhibitor I  |             |  | 9951490             |
| MEK Inhibitor II | 623163-52-0 |  | 389898              |

Table S1. Cont.

| Description                  | CAS Number  | Structure | PubChem Compound ID |
|------------------------------|-------------|-----------|---------------------|
| MEK1/2 Inhibitor             | 305350-87-2 |           | 9549284             |
| MNK1 Inhibitor               | 522629-08-9 |           | 11644425            |
| NF-κB Activation Inhibitor   | 545380-34-5 |           | 509554              |
| p38 MAP Kinase Inhibitor III | 581098-48-8 |           | 6419739             |

Table S1. Cont.

| Description              | CAS Number  | Structure                                                                            | PubChem Compound ID |
|--------------------------|-------------|--------------------------------------------------------------------------------------|---------------------|
| p38 MAP Kinase Inhibitor | 219138-24-6 | 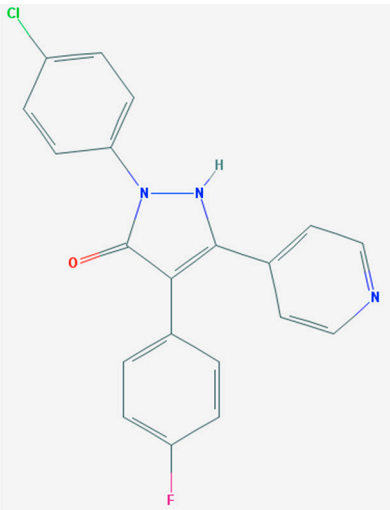   | 4665                |
| PD 98059                 | 167869-21-8 |   | 4713                |
| PD 169316                | 152121-53-4 |  | 4712                |



Table S1. Cont.

| Description                 | CAS Number  | Structure | PubChem Compound ID |
|-----------------------------|-------------|-----------|---------------------|
| SB220025                    | 165806-53-1 |           | 5164                |
| Purvalanol A                | 212844-53-6 |           | 4987                |
| GSK3b Inhibitor XII, TWS119 | 601514-19-6 |           | 9549289             |
| H-89, Dihydrochloride       | 127243-85-0 |           | 5702541             |

Table S1. Cont.

| Description                                                          | CAS Number  | Structure                                                                            | PubChem Compound ID |
|----------------------------------------------------------------------|-------------|--------------------------------------------------------------------------------------|---------------------|
| SB 202474,<br>Negative control for<br>p38 MAPK<br>inhibition studies | 172747-50-1 | 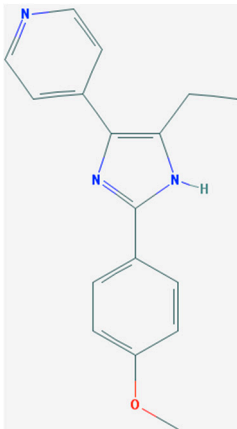   | 5162                |
| SB 202190                                                            | 152121-30-7 |   | 5353940             |
| SB 203580                                                            | 152121-47-6 |  | 176155              |
| HA 1077,<br>Dihydrochloride<br>Fasudil                               | 103745-39-7 |  | 16219471            |

Table S1. Cont.

| Description                     | CAS Number   | Structure                                                                            | PubChem Compound ID |
|---------------------------------|--------------|--------------------------------------------------------------------------------------|---------------------|
| SB 218078                       | 135897-06-2  | 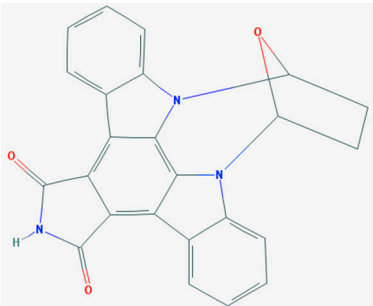   | 3387354             |
| SC-68376                        | 318480-82-9  |    | 5174                |
| SKF-86002                       | 72873-74-6   |   | 5228                |
| Sphingosine Kinase Inhibitor    | 1177741-83-1 |  | 16760659            |
| Staurosporine, Streptomyces sp. | 62996-74-1   |  | 451705              |

Table S1. Cont.

| Description           | CAS Number  | Structure                                                                            | PubChem Compound ID |
|-----------------------|-------------|--------------------------------------------------------------------------------------|---------------------|
| STO-609               | 52029-86-4  | 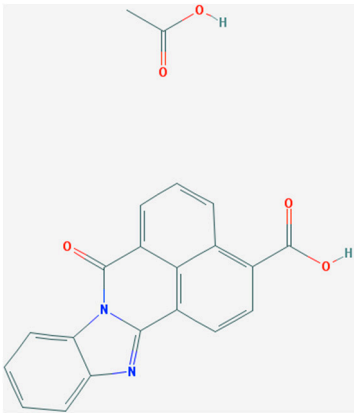   | 16760660            |
| SU9516                | 666837-93-0 |   | 5289419             |
| Tpl2 Kinase Inhibitor | 871307-18-5 |  | 9549300             |
| AMP                   | 61-19-8     |  | 6083                |
| ADP                   | 58-64-0     |  | 6022                |

Table S1. Cont.

| Description | CAS Number | Structure                                                                            | PubChem Compound ID |
|-------------|------------|--------------------------------------------------------------------------------------|---------------------|
| ATP         | 56-65-5    | 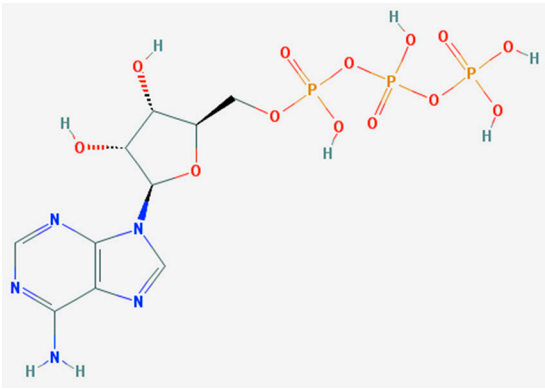   | 5957                |
| ATP-gammaS  | 35094-46-3 |   | 440317              |
| SU11652     |            |  | 5329103             |

## References

1. Bolton, E.; Wang, Y.; Thiessen, P.A.; Bryant, S.H. Chapter 12—PubChem: Integrated Platform of Small Molecules and Biological Activities. *Annu. Rep. Comput. Chem.* **2008**, *4*, 217–241.
